# Supplementary material for: A green protocol for the Pd catalyzed ligand free homocoupling reaction of arylboronic acids under ambient conditions
Source: Royal Society of Chemistry journal article supplement (doi:10.1039/c4ra05230g), 2014-01-01
Supplement: c4ra05230g1.pdf [file c4ra05230g1.pdf]

## **Supporting Information**

### **A simple competent etiquette for Pd catalyzed ligand free homocoupling of aryl boronic acids in water at ambient conditions**

Seema Dwivedi, Soumik Bardhan, Prasanjit Ghosh and Sajal Das\*

Department of Chemistry, University of North Bengal, Darjeeling 734 013, INDIA

E-mail: [sajal.das@hotmail.com](mailto:sajal.das@hotmail.com)

#### **Scan copies of NMR Spectra**

|                                                                                          |            |
|------------------------------------------------------------------------------------------|------------|
| <sup>1</sup> H NMR and <sup>13</sup> C spectra of biphenyl.....                          | S2         |
| <sup>1</sup> H NMR and <sup>13</sup> C spectra of 3,3'-dimethylbiphenyl.....             | S3         |
| <sup>1</sup> H NMR and <sup>13</sup> C spectra of 4,4'-dimethoxybiphenyl .....           | S4         |
| <sup>1</sup> H NMR and <sup>13</sup> C spectra of 4,4'-dicyanobiphenyl.....              | S5         |
| <sup>1</sup> H NMR and <sup>13</sup> C spectra of 4,4'-difluorobiphenyl.....             | S6         |
| <sup>1</sup> H NMR and <sup>13</sup> C spectra of 1,1'-binaphthyl.....                   | S7         |
| <sup>1</sup> H NMR and <sup>13</sup> C spectra of 2,2'-dichlorobiphenyl.....             | S8         |
| <sup>1</sup> H NMR and <sup>13</sup> C spectra of 3,3'- dinitrobiphenyl.....             | S9         |
| <sup>1</sup> H NMR and <sup>13</sup> C spectra of 1,1'-biphenyl-4,4'-dicarbaldehyde..... | S10        |
| <sup>1</sup> H NMR and <sup>13</sup> C spectra of 2,2'-dithiophene.....                  | S11        |
| <sup>1</sup> H NMR and <sup>13</sup> C spectra of 5,5'-dimethyl-2,2'-dithiophene.....    | S12        |
| <b>FTIR Analysis data.....</b>                                                           | <b>S13</b> |

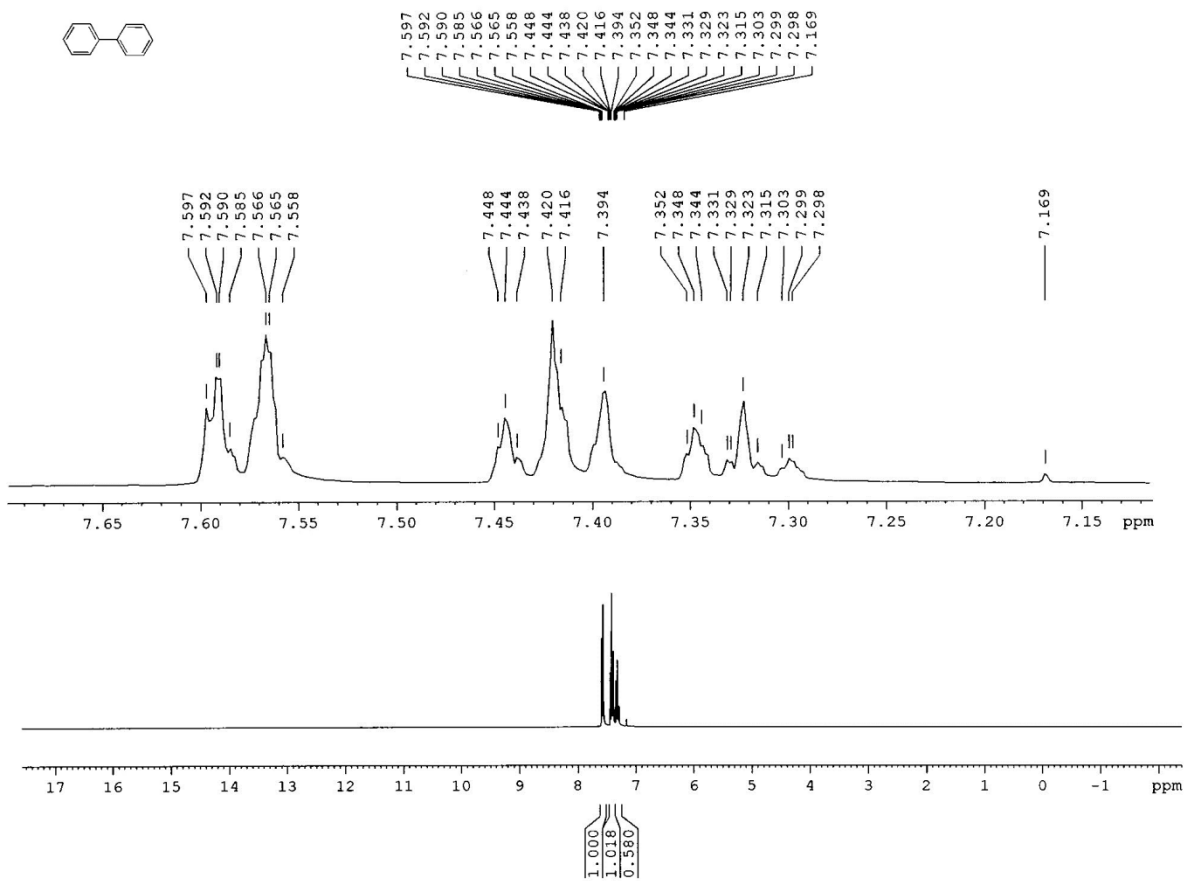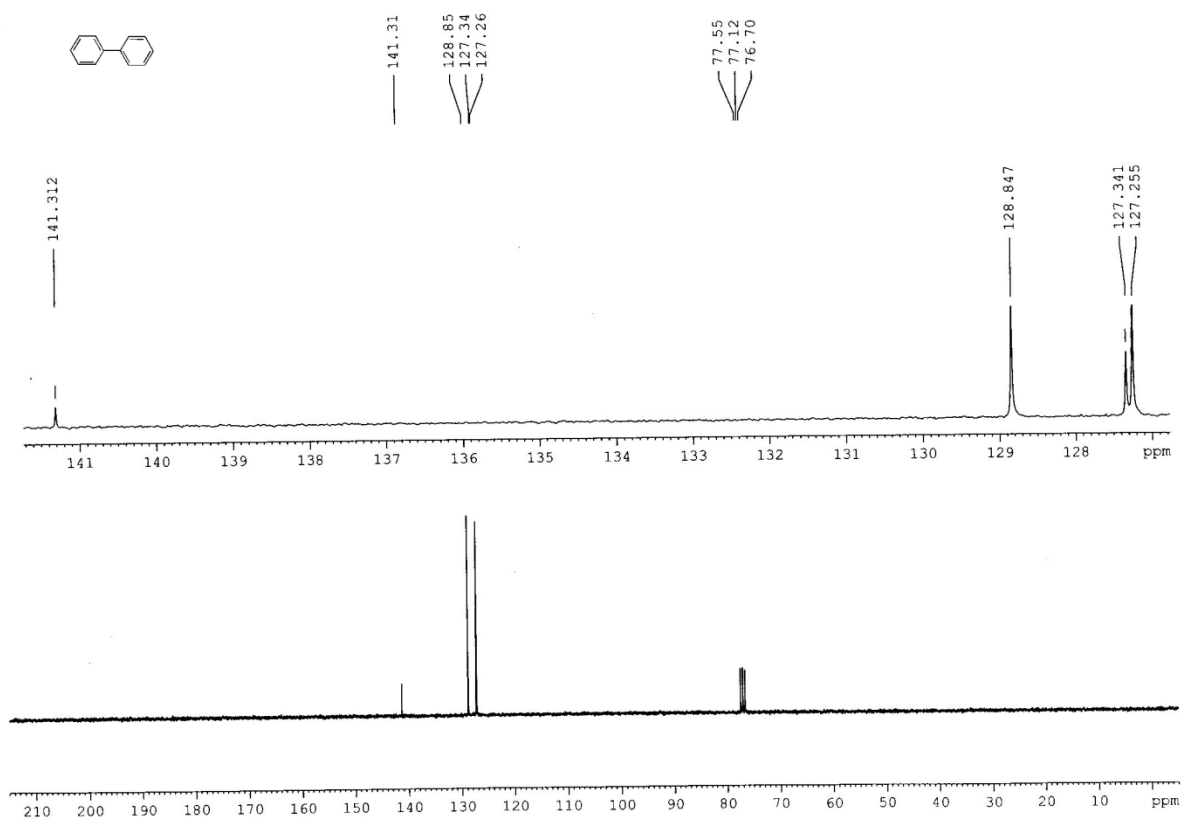

2)  $^1\text{H}$  NMR and  $^{13}\text{C}$  spectra of 3,3'-dimethylbiphenyl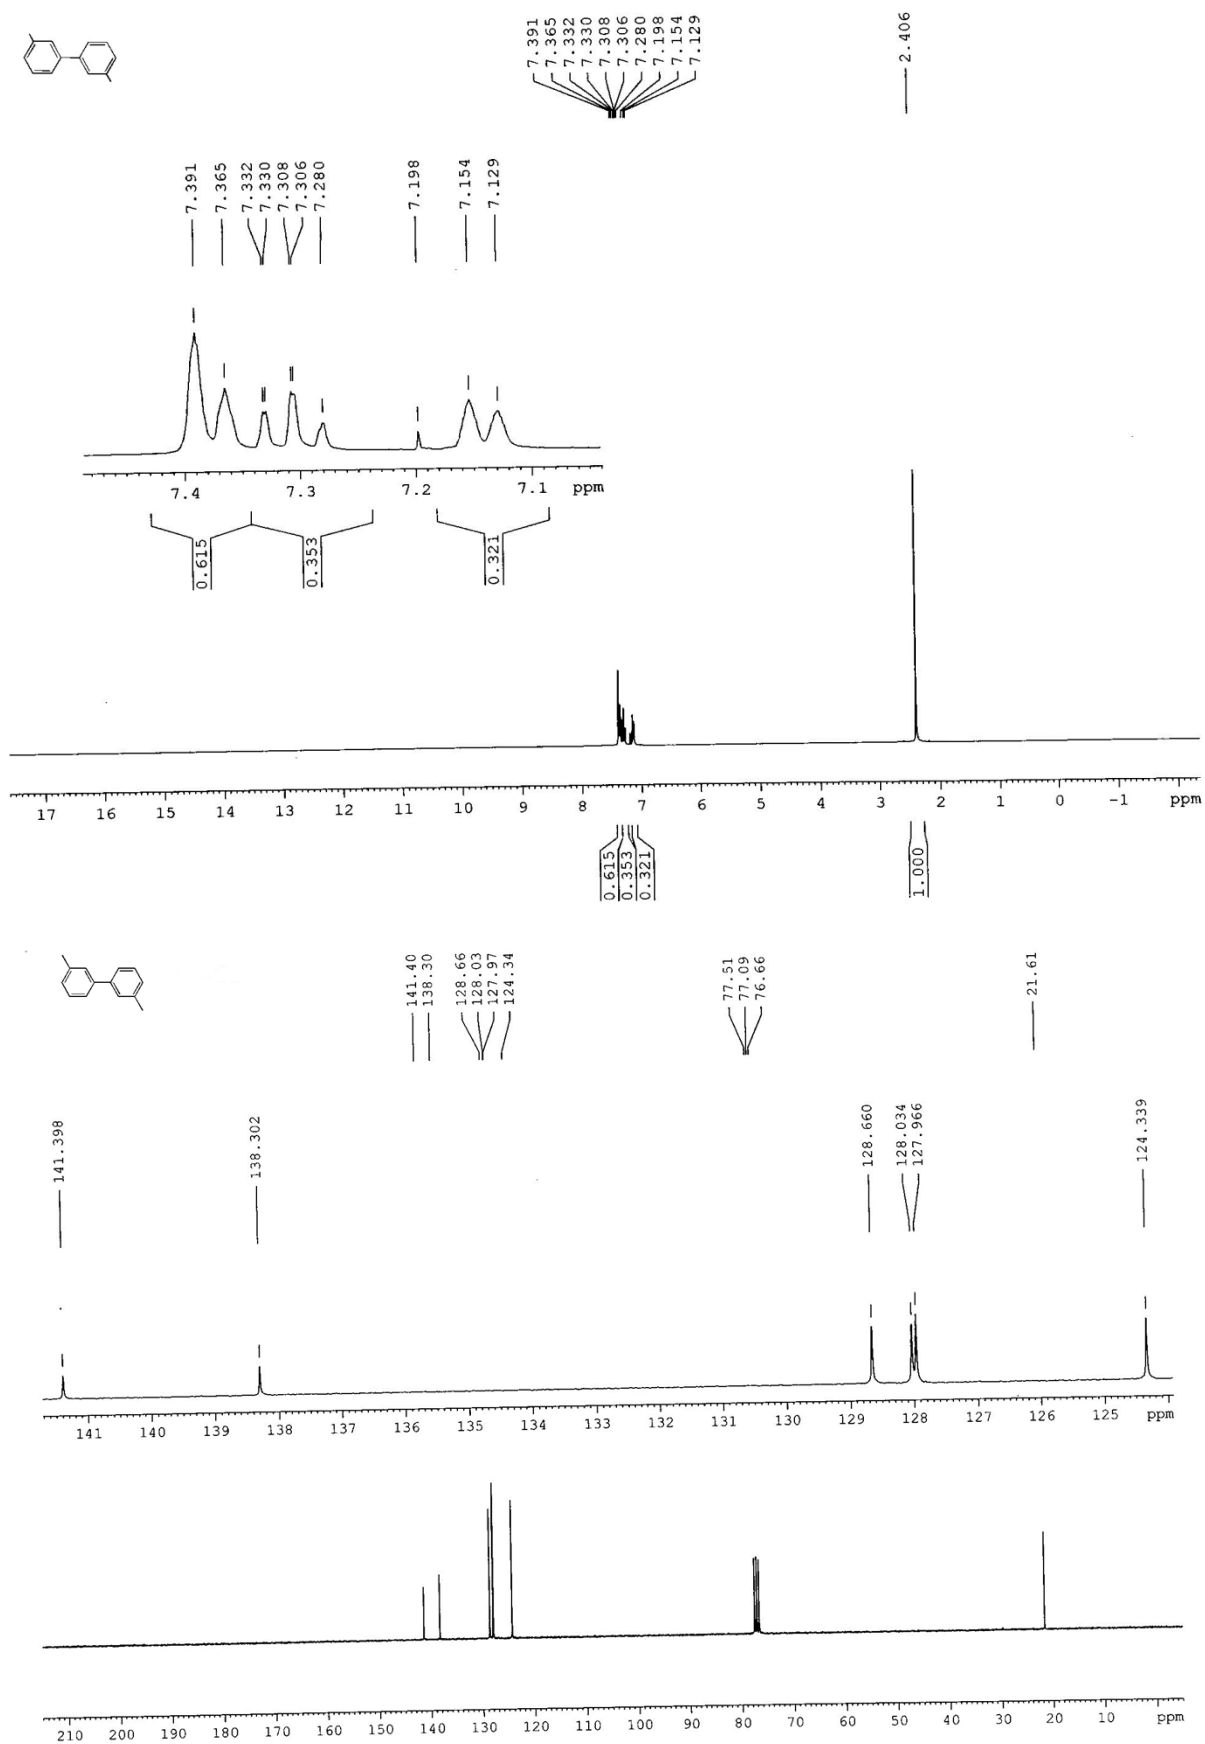

3)  $^1\text{H}$  NMR and  $^{13}\text{C}$  spectra of 4,4'-dimethoxybiphenyl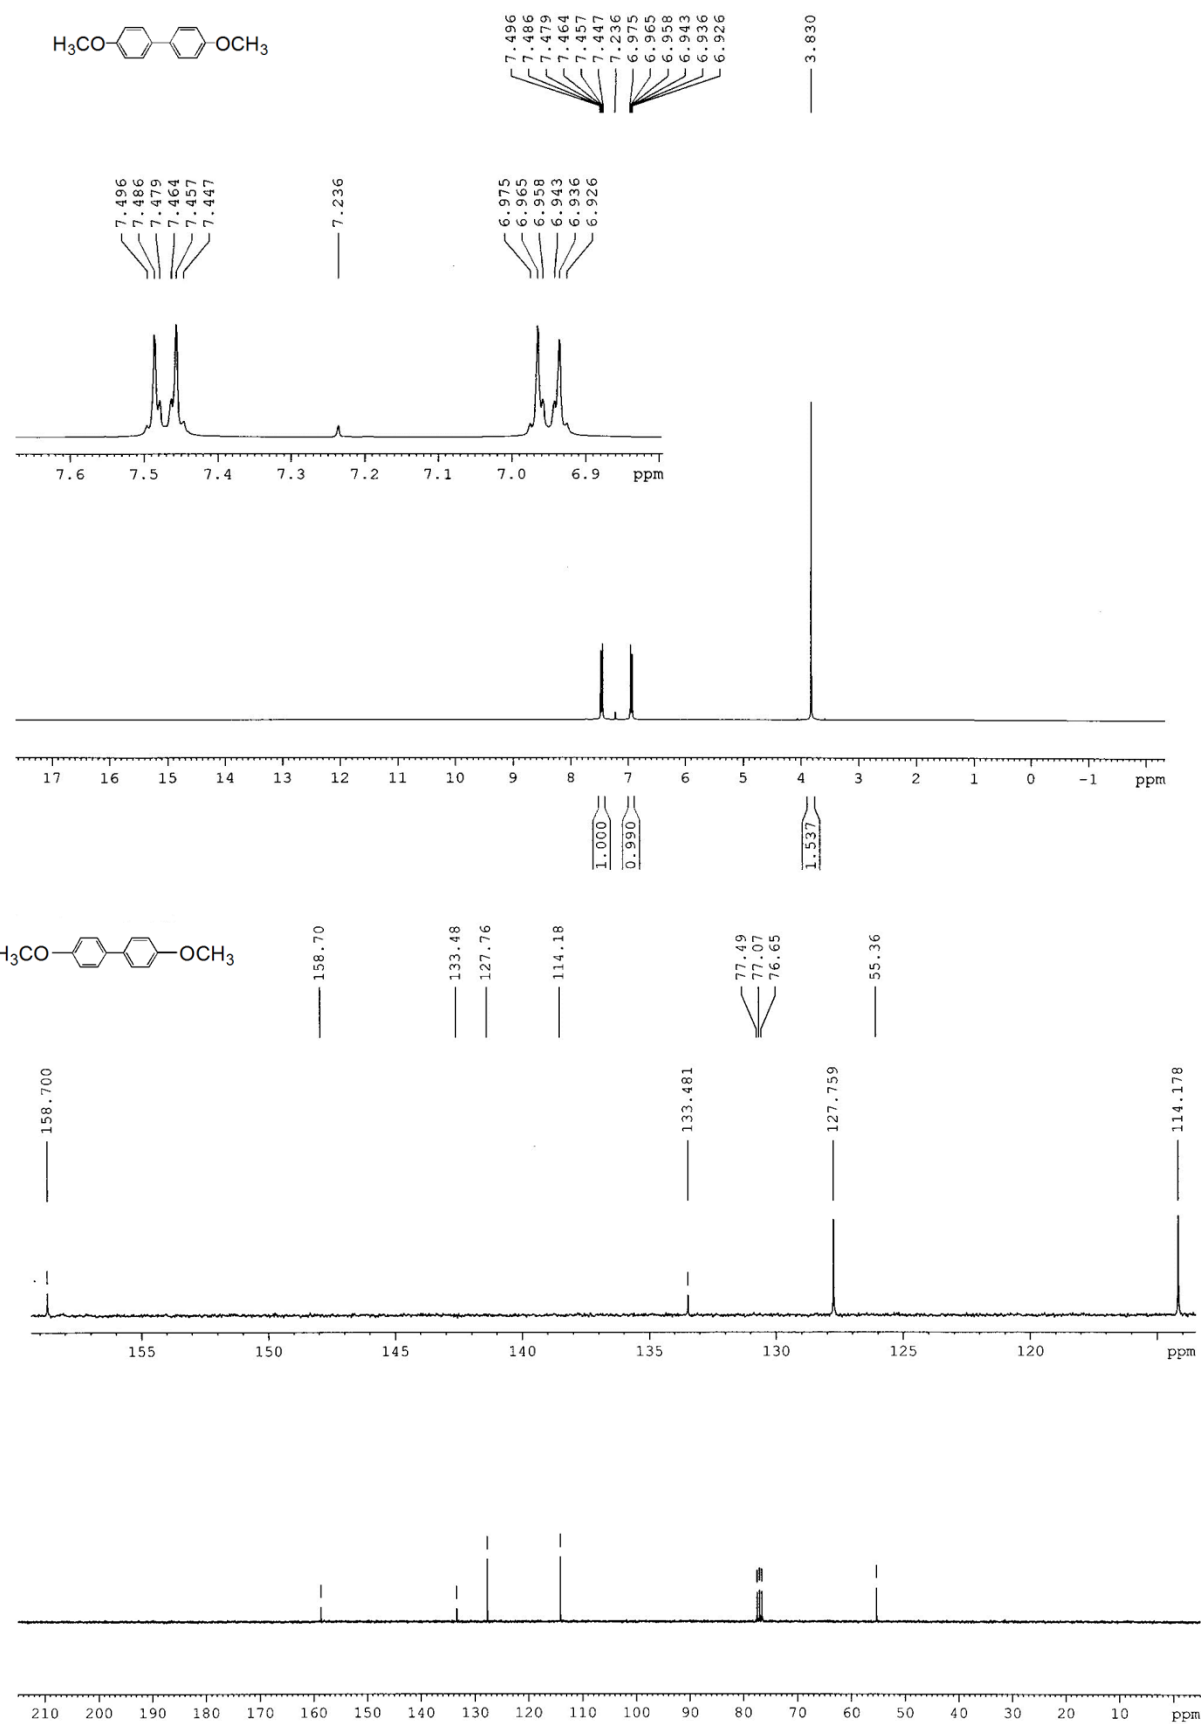

4)  $^1\text{H}$  NMR and  $^{13}\text{C}$  spectra of 4,4'-dicyanobiphenyl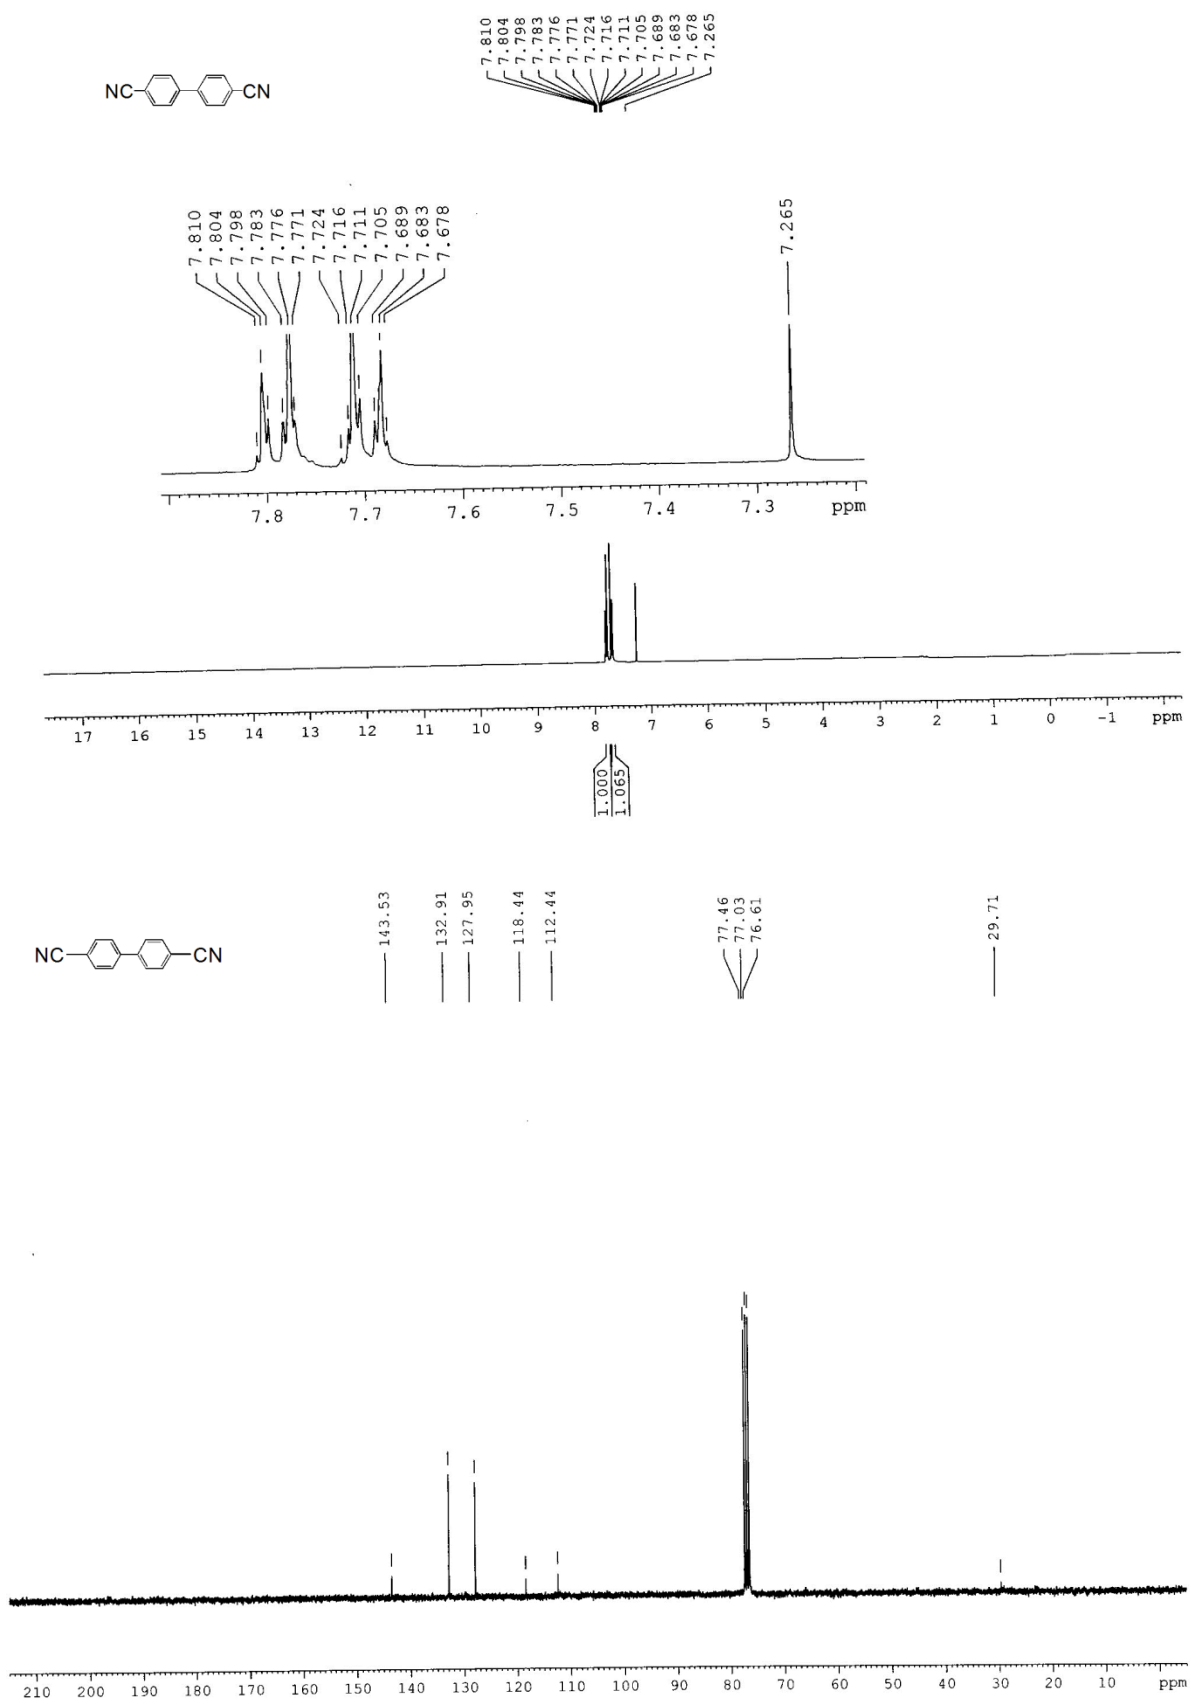

5)  $^1\text{H}$  NMR and  $^{13}\text{C}$  spectra of 4,4'-difluorobiphenyl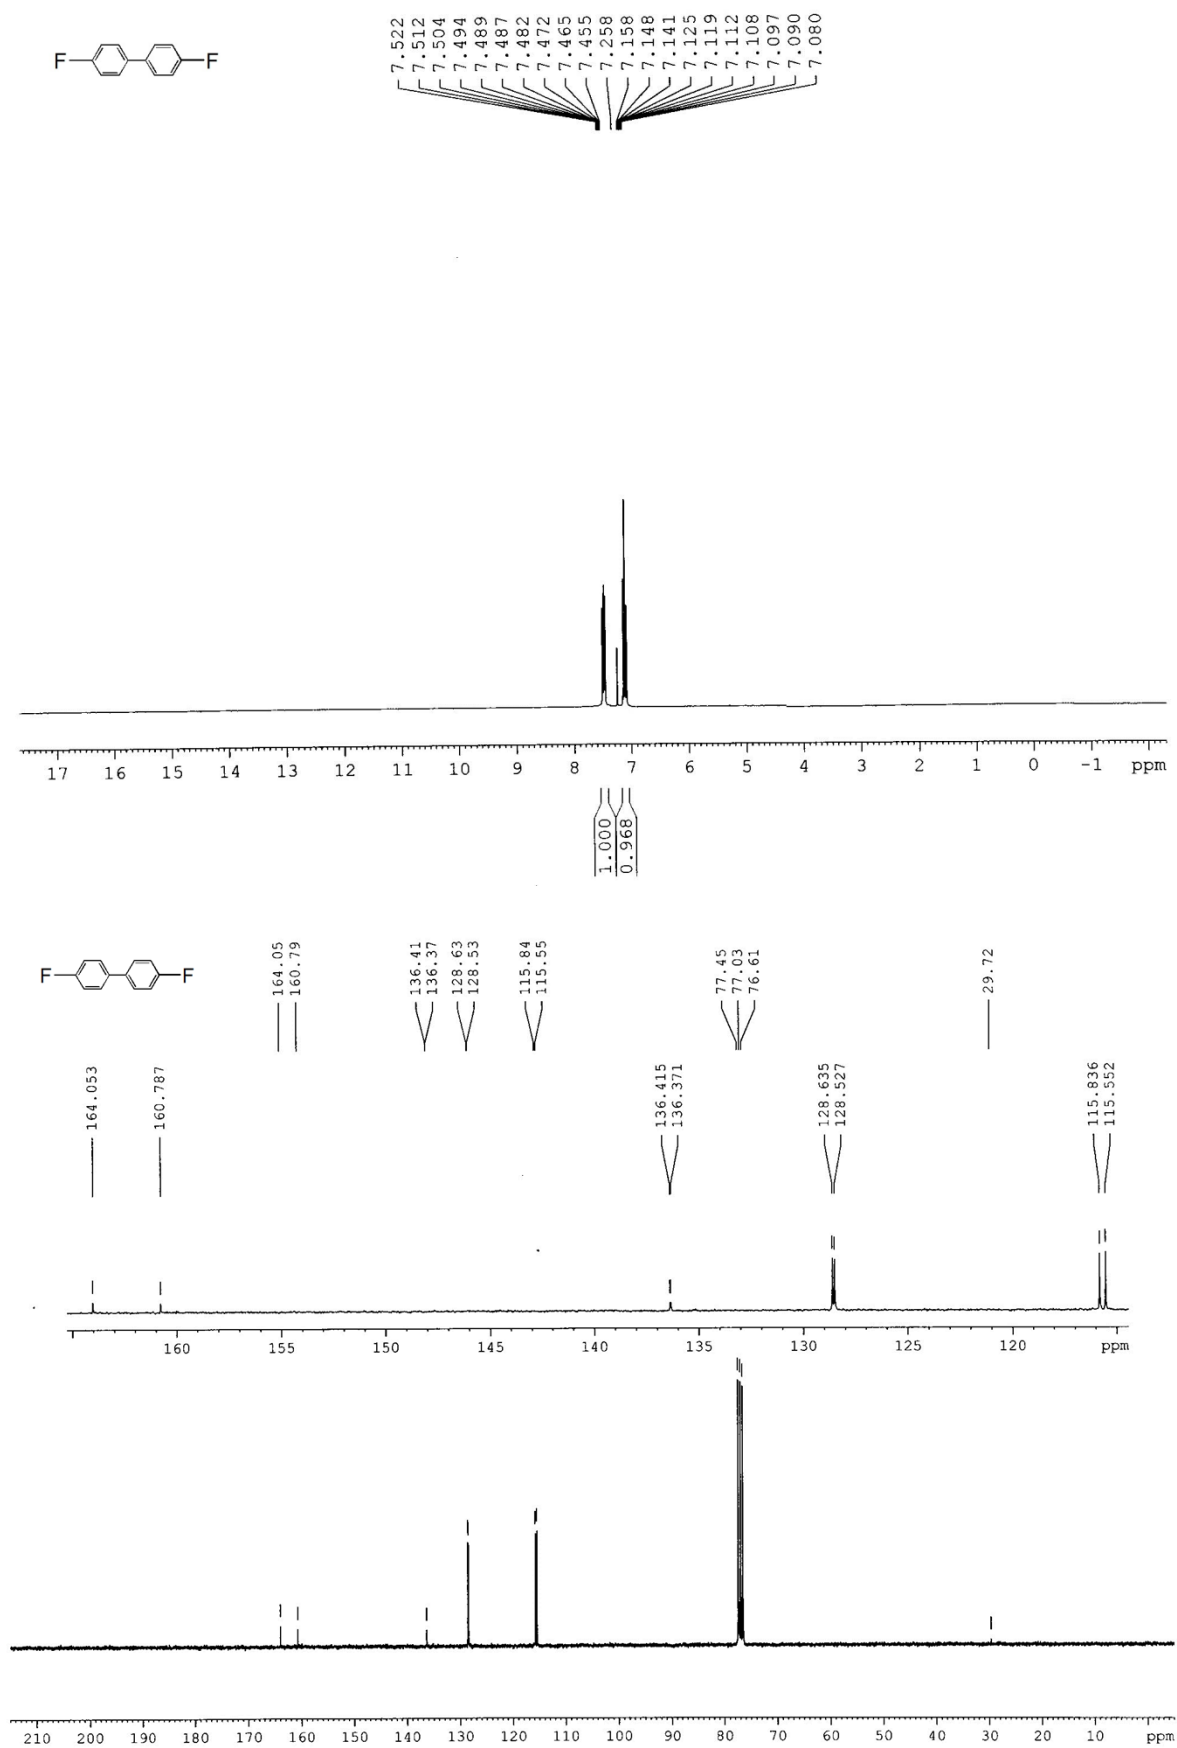

6)  $^1\text{H}$  NMR and  $^{13}\text{C}$  spectra of 1,1'-binaphthyl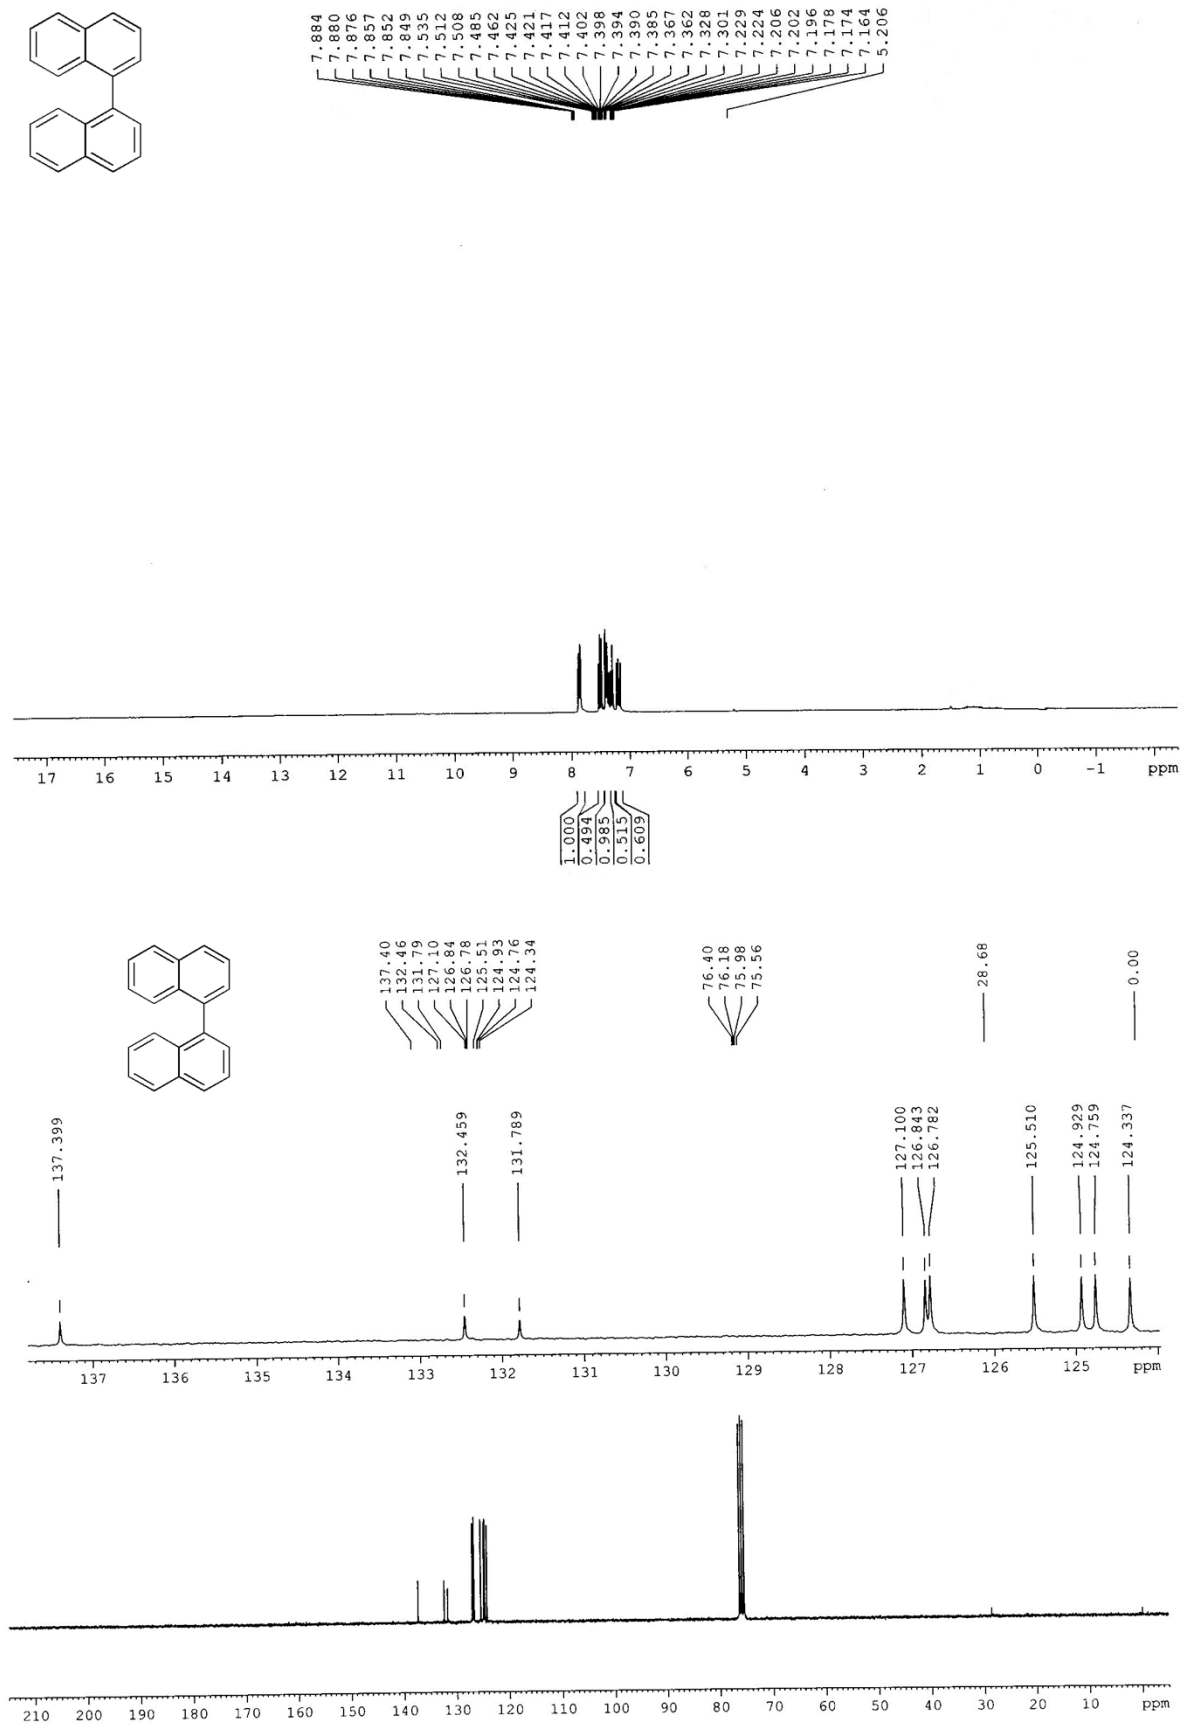

7)  $^1\text{H}$  NMR and  $^{13}\text{C}$  spectra of 2,2'-dichlorobiphenyl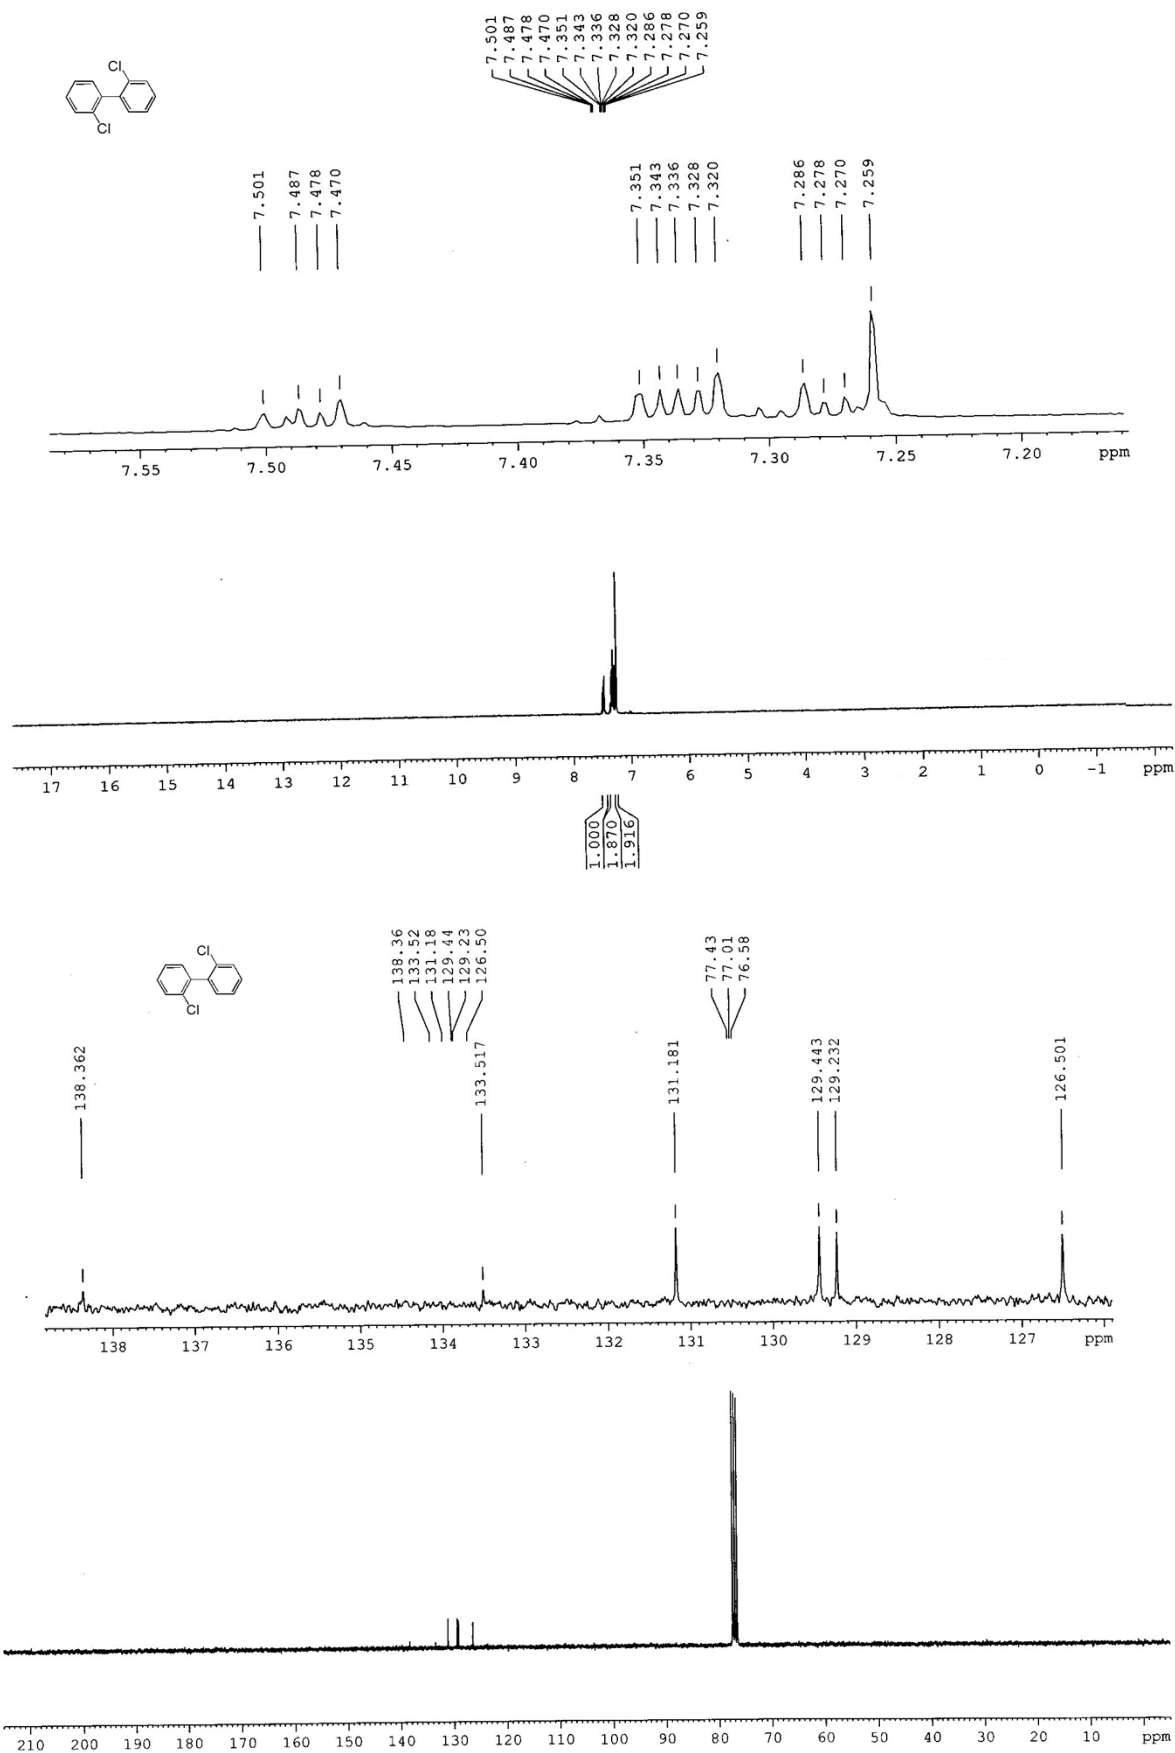



8)  $^1\text{H}$  NMR and  $^{13}\text{C}$  spectra of 3,3'-dinitrobiphenyl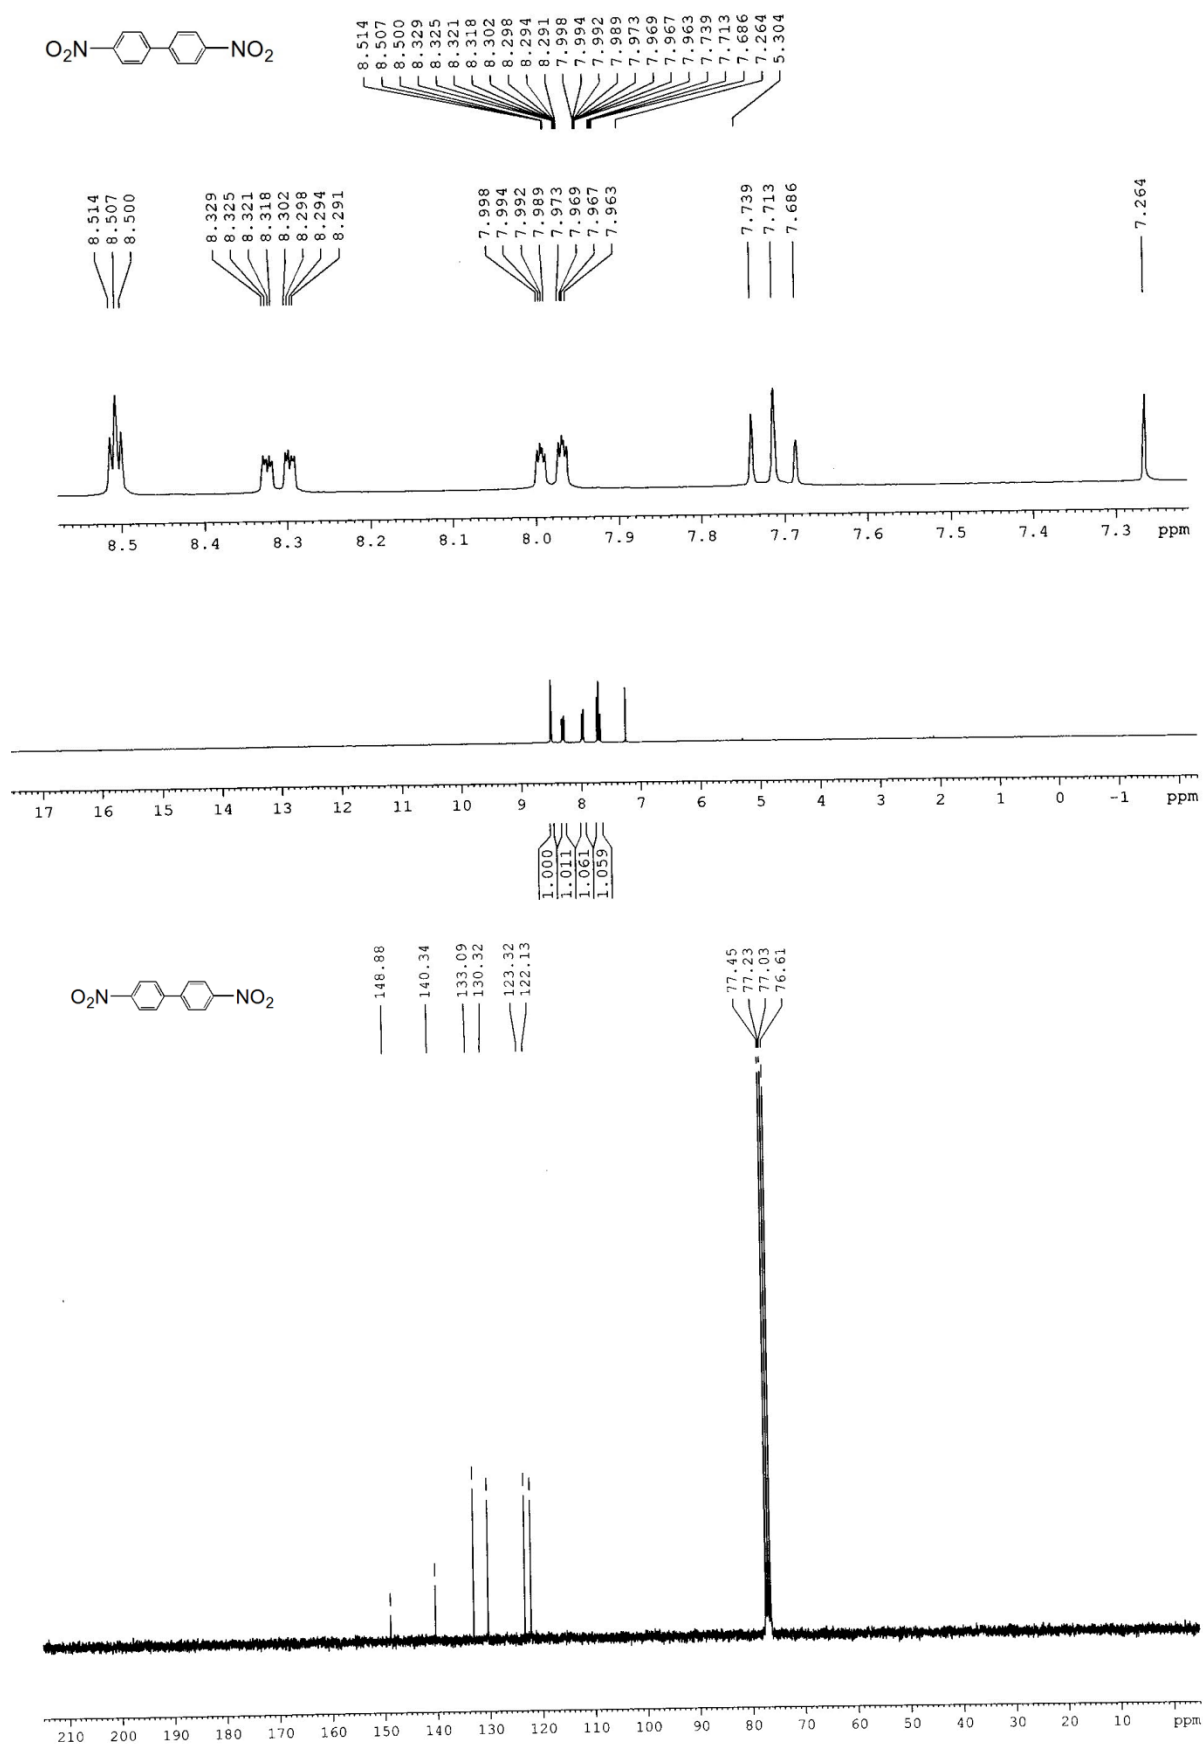

9)  $^1\text{H}$  NMR and  $^{13}\text{C}$  spectra of 1,1'-biphenyl-4,4'-dicarbaldehyde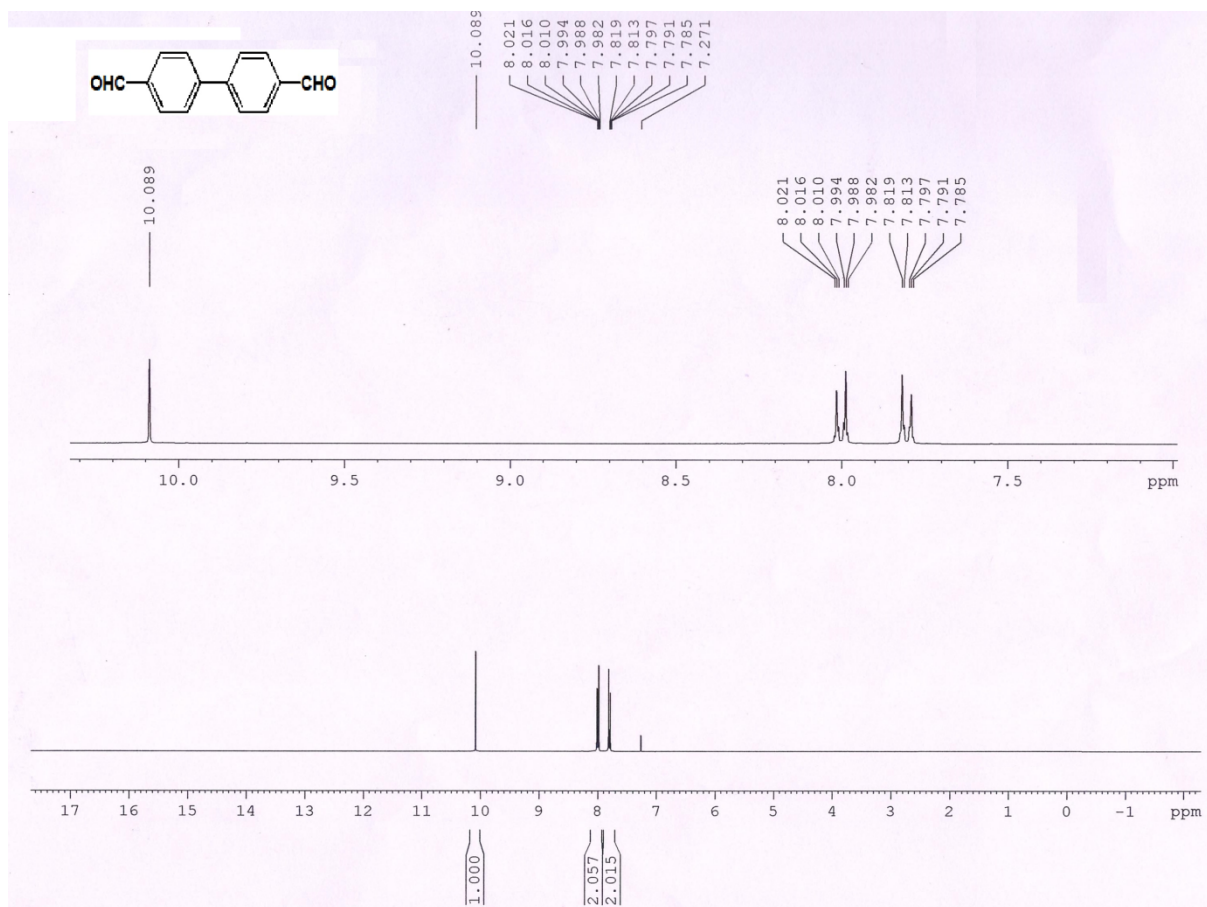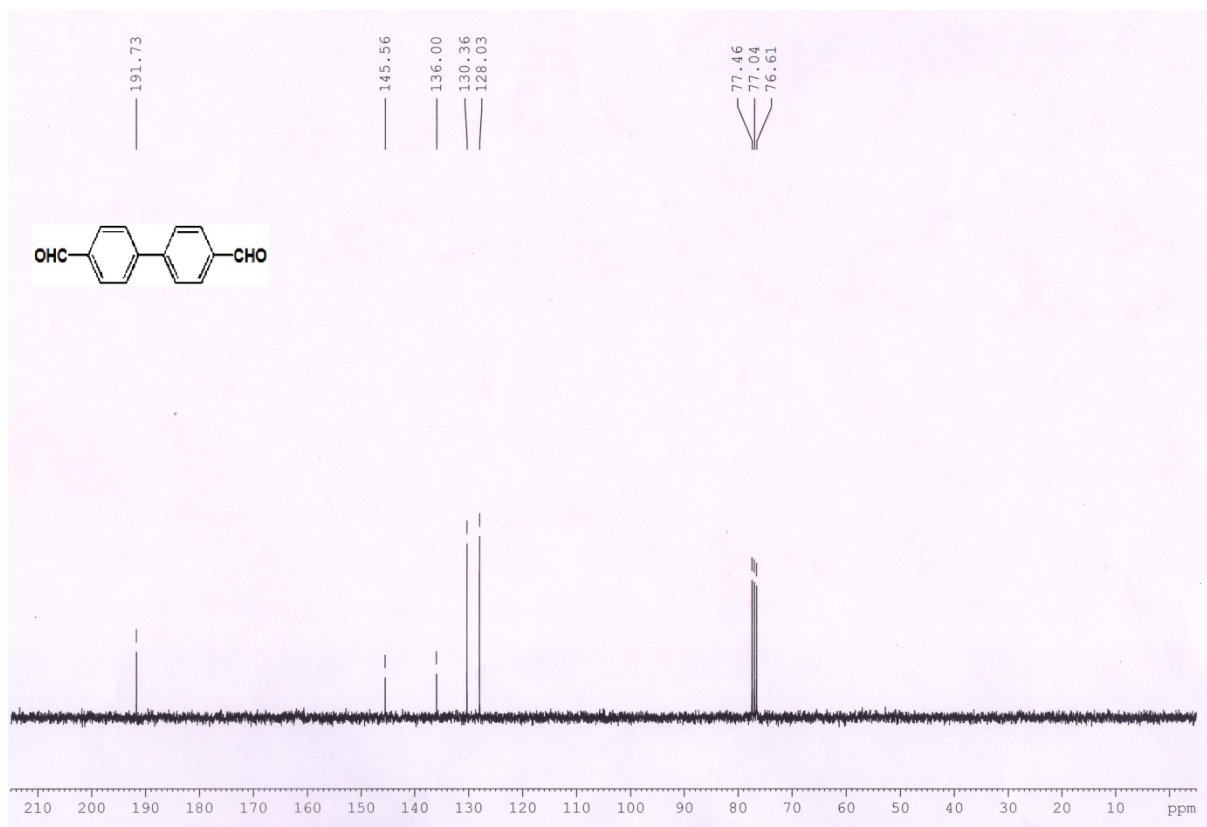

10)  $^1\text{H}$  NMR and  $^{13}\text{C}$  spectra of 2,2'-bithiophene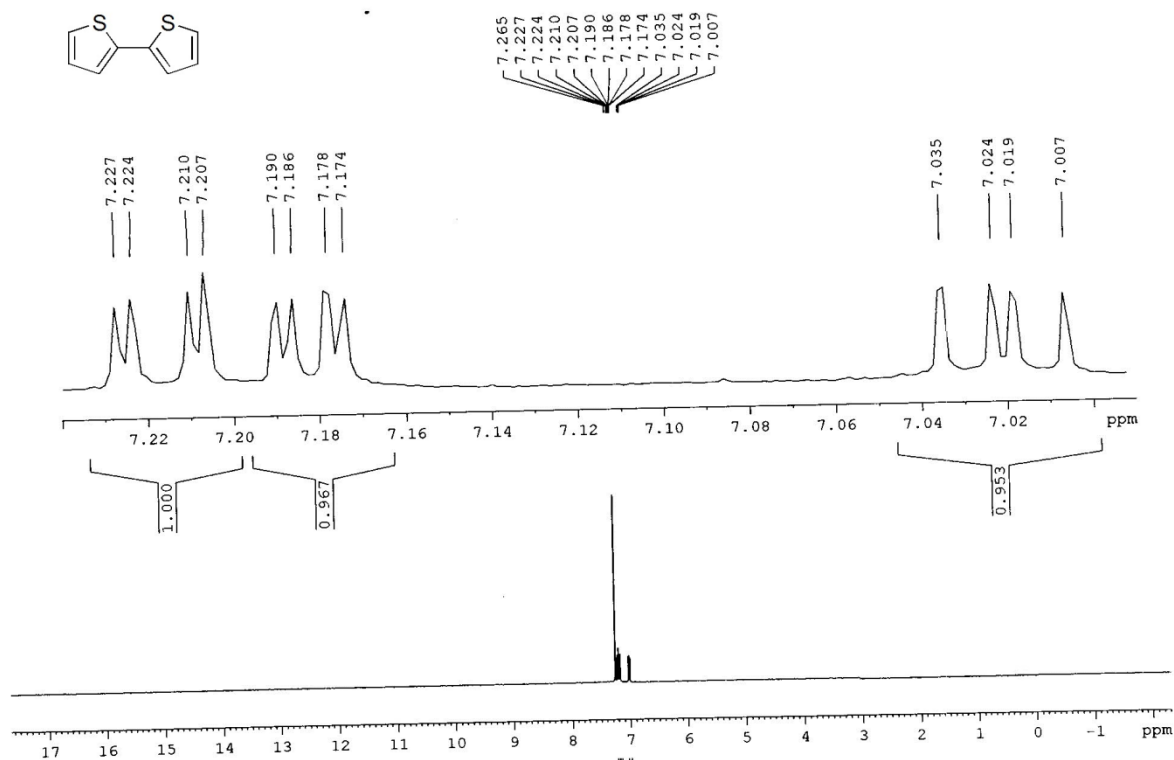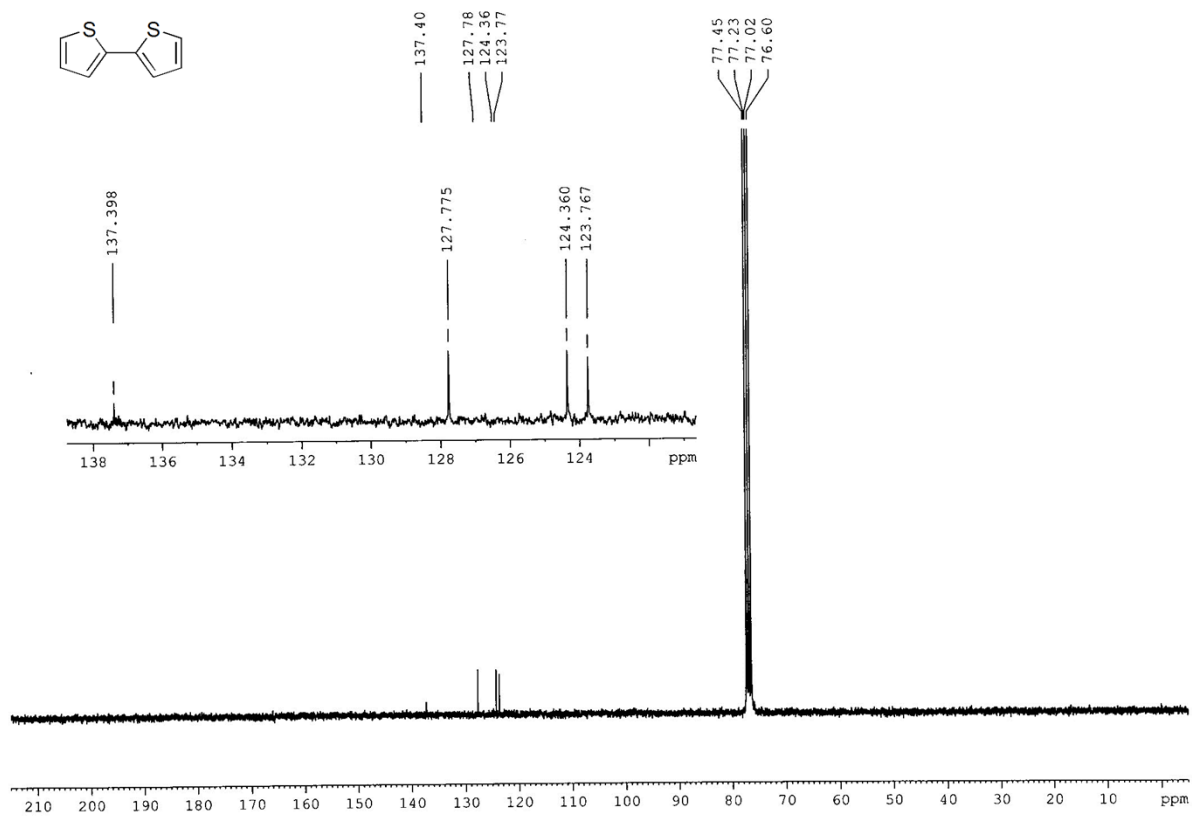

11)  $^1\text{H}$  NMR and  $^{13}\text{C}$  spectra of 5,5'-dimethyl-2,2'-bithiophene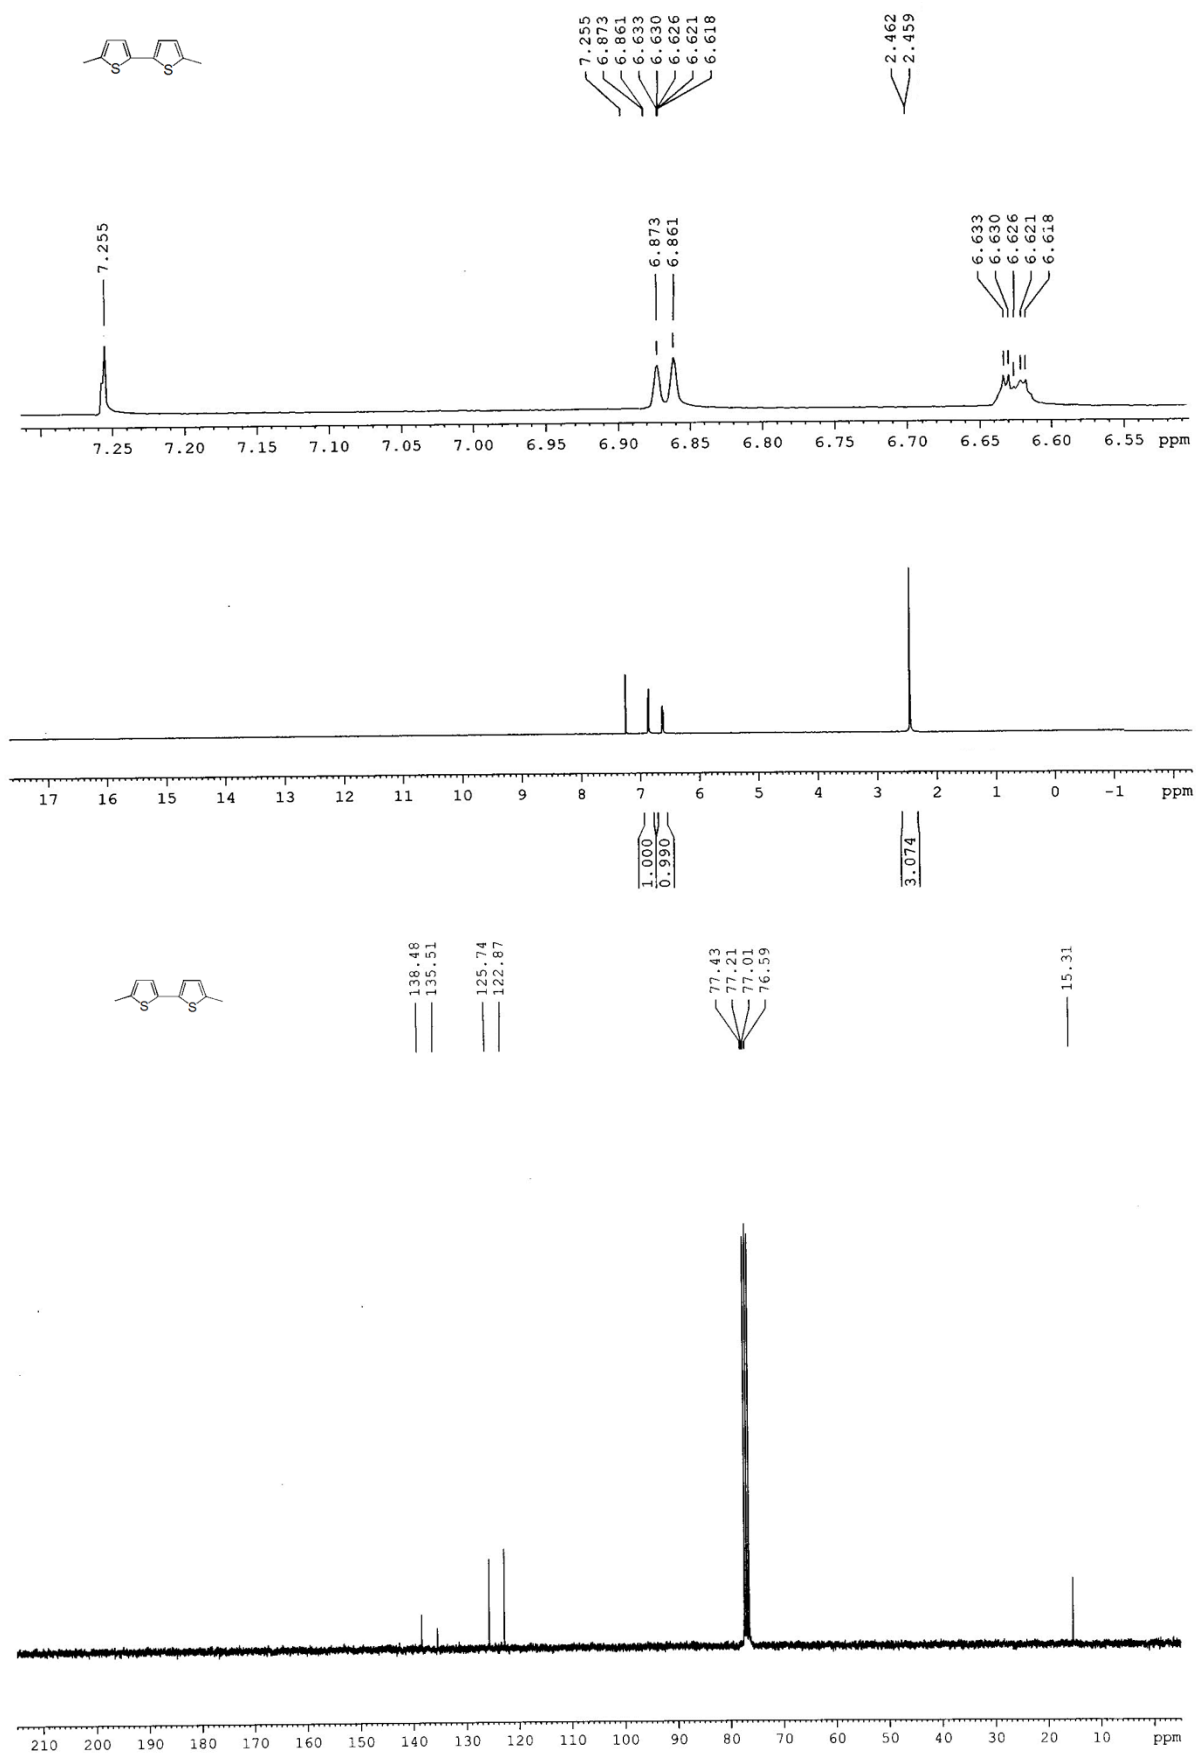

## FTIR analysis Data

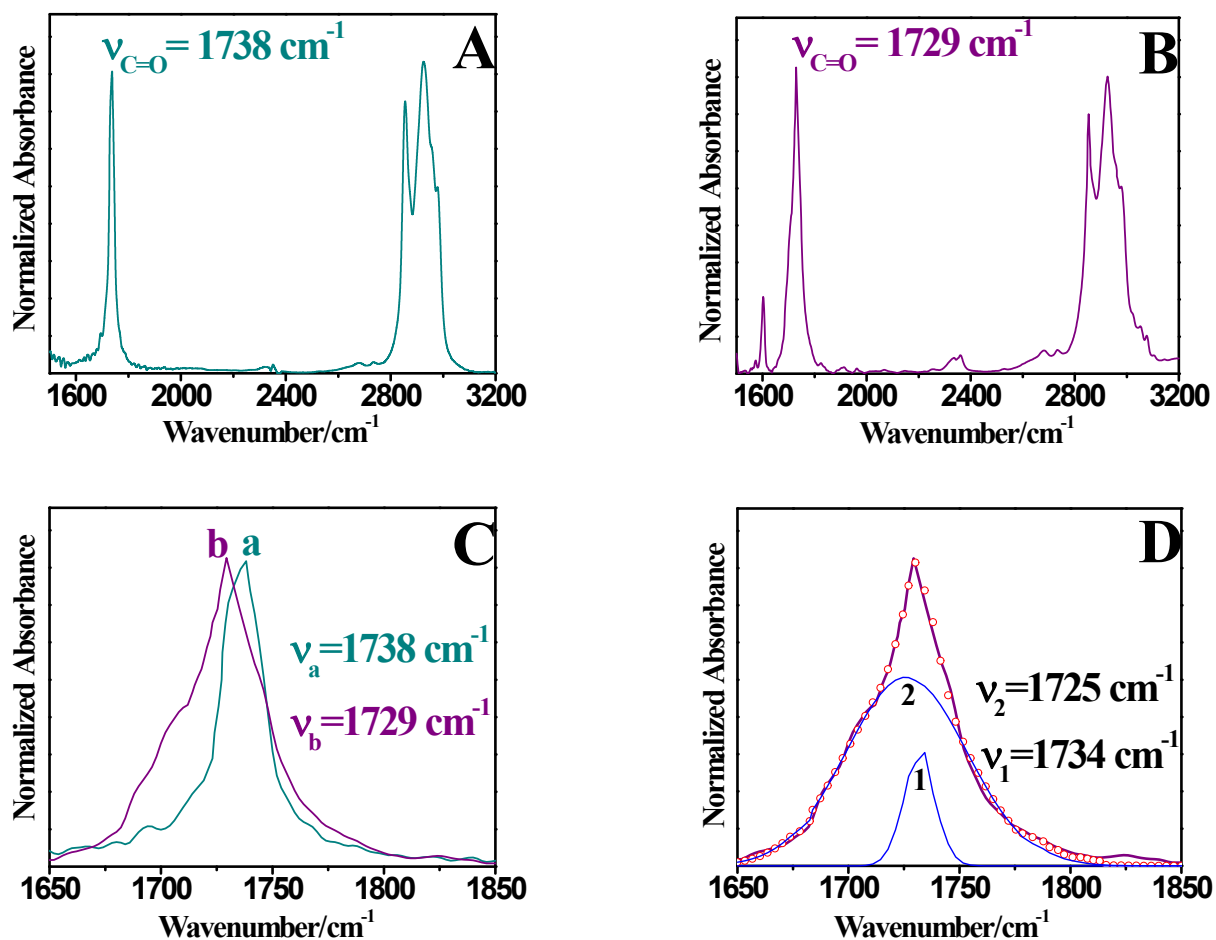

Figure: (A) FTIR spectra of IPM, (B) FTIR spectra of IPM in presence of PhB(OH)<sub>2</sub> (1:1), (C) Shifting of C=O stretching band of ester group in IPM (Specification: a; neat IPM, b; IPM in presence of PhB(OH)<sub>2</sub> (1:1)), (D) Gaussian deconvolution of C=O stretching band of IPM in presence PhB(OH)<sub>2</sub> (1:1) (Specification: Experimental spectra, overall fitted point (open circle) and deconvoluted curves, 1: free C=O stretching band ; 2: bound C=O stretching band)
